# Supplementary material for: Sustainable Extractions for Maximizing Content of Antioxidant Phytochemicals from Black and Red Currants
Source: MDPI journal article supplement (doi:10.3390/foods11030325), 2022-01-24
Supplement: s1 [file s1]

**Table S1.** Total extraction yield (Y) of black and red currant extracts obtained by conventional and sustainable extraction techniques

| Black currant |                            |      | Red currant               |       |      |
|---------------|----------------------------|------|---------------------------|-------|------|
| Sample        | Y [%]                      | std  | Sample                    | Y [%] | std  |
| BC-S/L-1      | 54.34 <sup>e,f,g,h,i</sup> | 0.54 | RC-S/L-1 <sup>d,e</sup>   | 47.56 | 0.47 |
| BC-S/L-2      | 53.44 <sup>g,h,i</sup>     | 0.61 | RC-S/L-2 <sup>c,d</sup>   | 48.85 | 0.24 |
| BC-S/L-3      | 53.97 <sup>f,g,h,i</sup>   | 0.87 | RC-S/L-3 <sup>e</sup>     | 45.89 | 1.02 |
| BC-UAE-1      | 56.21 <sup>d,e,f,g</sup>   | 0.87 | RC-UAE-1 <sup>b</sup>     | 53.35 | 0.25 |
| BC-UAE-2      | 57.18 <sup>c,d,e,f</sup>   | 0.36 | RC-UAE-2 <sup>b</sup>     | 53.22 | 0.18 |
| BC-UAE-3      | 68.43 <sup>a</sup>         | 0.73 | RC-UAE-3 <sup>c,d</sup>   | 49.60 | 0.62 |
| BC-UAE-4      | 52.21 <sup>h,i</sup>       | 0.29 | RC-UAE-4 <sup>d,e</sup>   | 47.46 | 1.23 |
| BC-UAE-5      | 57.70 <sup>c,d,e</sup>     | 0.95 | RC-UAE-5 <sup>c</sup>     | 50.11 | 0.53 |
| BC-MAE-1      | 61.68 <sup>b</sup>         | 0.25 | RC-MAE-1 <sup>c,d</sup>   | 49.40 | 1.11 |
| BC-MAE-2      | 51.38 <sup>i</sup>         | 3.24 | RC-MAE-2 <sup>c,d,e</sup> | 47.89 | 0.41 |
| BC-MAE-3      | 47.19 <sup>j</sup>         | 0.22 | RC-MAE-3 <sup>e</sup>     | 46.24 | 0.48 |
| BC-PLE-1      | 47.54 <sup>j</sup>         | 1.04 | RC-PLE-1 <sup>c,d</sup>   | 49.46 | 1.49 |
| BC-PLE-2      | 60.10 <sup>b,c</sup>       | 1.35 | RC-PLE-2 <sup>a</sup>     | 56.04 | 0.82 |
| BC-PLE-3      | 55.62 <sup>d,e,f,g,h</sup> | 0.50 | RC-PLE-3 <sup>a,b</sup>   | 54.79 | 0.18 |
| BC-PLE-4      | 58.18 <sup>c,d</sup>       | 1.67 | RC-PLE-4 <sup>f</sup>     | 38.49 | 0.45 |
| BC-PLE-5      | 58.75 <sup>b,c,d</sup>     | 0.33 | RC-PLE-5 <sup>b</sup>     | 52.62 | 0.98 |

Results were expressed as mean  $\pm$  standard deviation (SD). Tukey's multiple comparison test was performed at  $p < 0.05$  and different letters represent statistically significant differences among samples.

**Table S2.** Total phenolic content (TPC) of black and red currant extracts obtained by conventional and sustainable extraction techniques

| Black currant |                     |        | Red currant |                     |        |
|---------------|---------------------|--------|-------------|---------------------|--------|
| Sample        | TP [g GAE/100 g]    | std    | Sample      | TP [g GAE/100 g]    | std    |
| BC-S/L-1      | 2.0849 <sup>h</sup> | 0.0243 | RC-S/L-1    | 1.6646 <sup>j</sup> | 0.0070 |
| BC-S/L-2      | 2.2219 <sup>g</sup> | 0.0039 | RC-S/L-2    | 1.6399 <sup>j</sup> | 0.0085 |
| BC-S/L-3      | 1.9389 <sup>i</sup> | 0.0217 | RC-S/L-3    | 1.3232 <sup>k</sup> | 0.0108 |
| BC-UAE-1      | 2.6688 <sup>d</sup> | 0.0103 | RC-UAE-1    | 2.0587 <sup>f</sup> | 0.0070 |
| BC-UAE-2      | 2.7227 <sup>d</sup> | 0.0170 | RC-UAE-2    | 2.0621 <sup>f</sup> | 0.0103 |
| BC-UAE-3      | 2.9428 <sup>c</sup> | 0.0170 | RC-UAE-3    | 1.7544 <sup>i</sup> | 0.0103 |
| BC-UAE-4      | 2.5947 <sup>e</sup> | 0.0318 | RC-UAE-4    | 1.8892 <sup>h</sup> | 0.0039 |
| BC-UAE-5      | 2.9630 <sup>c</sup> | 0.0103 | RC-UAE-5    | 2.1284 <sup>e</sup> | 0.0118 |

|          |                     |        |          |                     |        |
|----------|---------------------|--------|----------|---------------------|--------|
| BC-MAE-1 | 3.4122 <sup>a</sup> | 0.0067 | RC-MAE-1 | 2.3777 <sup>c</sup> | 0.0070 |
| BC-MAE-2 | 2.9091 <sup>c</sup> | 0.0140 | RC-MAE-2 | 2.2979 <sup>d</sup> | 0.0051 |
| BC-MAE-3 | 2.3768 <sup>f</sup> | 0.0237 | RC-MAE-3 | 1.9700 <sup>g</sup> | 0.0103 |
| BC-PLE-1 | 2.9563 <sup>c</sup> | 0.0217 | RC-PLE-1 | 2.3889 <sup>c</sup> | 0.0039 |
| BC-PLE-2 | 3.0237 <sup>b</sup> | 0.0206 | RC-PLE-2 | 2.5978 <sup>b</sup> | 0.0118 |
| BC-PLE-3 | 2.6059 <sup>e</sup> | 0.0170 | RC-PLE-3 | 1.9038 <sup>h</sup> | 0.0019 |
| BC-PLE-4 | 3.0574 <sup>b</sup> | 0.0039 | RC-PLE-4 | 1.2738 <sup>l</sup> | 0.0070 |
| BC-PLE-5 | 2.9496 <sup>c</sup> | 0.0237 | RC-PLE-5 | 2.6303 <sup>a</sup> | 0.0070 |

Results were expressed as mean  $\pm$  standard deviation (SD). Tukey's multiple comparison test was performed at  $p < 0.05$  and different letters represent statistically significant differences among samples.

**Table S3.** Total flavonoid content (TF) of black and red currant extracts obtained by conventional and sustainable extraction techniques

| Black currant |                     |        | Red currant |                       |        |
|---------------|---------------------|--------|-------------|-----------------------|--------|
| Sample        | TF [g CE/100 g]     | std    | Sample      | TF [g CE/100 g]       | std    |
| BC-S/L-1      | 0.4903 <sup>f</sup> | 0.0025 | RC-S/L-1    | 0.4003 <sup>j</sup>   | 0.0006 |
| BC-S/L-2      | 0.4774 <sup>f</sup> | 0.0025 | RC-S/L-2    | 0.3913 <sup>k</sup>   | 0.0016 |
| BC-S/L-3      | 0.4717 <sup>f</sup> | 0.0033 | RC-S/L-3    | 0.3476 <sup>l</sup>   | 0.0033 |
| BC-UAE-1      | 0.6372 <sup>e</sup> | 0.0054 | RC-UAE-1    | 0.5221 <sup>f</sup>   | 0.0021 |
| BC-UAE-2      | 0.6529 <sup>e</sup> | 0.0037 | RC-UAE-2    | 0.5027 <sup>h,i</sup> | 0.0028 |
| BC-UAE-3      | 0.8321 <sup>a</sup> | 0.0050 | RC-UAE-3    | 0.5289 <sup>f</sup>   | 0.0035 |
| BC-UAE-4      | 0.6522 <sup>e</sup> | 0.0066 | RC-UAE-4    | 0.5432 <sup>e</sup>   | 0.0038 |
| BC-UAE-5      | 0.7841 <sup>b</sup> | 0.0099 | RC-UAE-5    | 0.5106 <sup>g,h</sup> | 0.0035 |
| BC-MAE-1      | 0.7934 <sup>b</sup> | 0.0081 | RC-MAE-1    | 0.4992 <sup>i</sup>   | 0.0016 |
| BC-MAE-2      | 0.6873 <sup>d</sup> | 0.0078 | RC-MAE-2    | 0.5636 <sup>d</sup>   | 0.0025 |
| BC-MAE-3      | 0.7038 <sup>d</sup> | 0.0045 | RC-MAE-3    | 0.5511 <sup>e</sup>   | 0.0021 |
| BC-PLE-1      | 0.7640 <sup>c</sup> | 0.0087 | RC-PLE-1    | 0.5124 <sup>g</sup>   | 0.0039 |

|          |                     |        |          |                     |        |
|----------|---------------------|--------|----------|---------------------|--------|
| BC-PLE-2 | 0.6515 <sup>e</sup> | 0.0054 | RC-PLE-2 | 0.5837 <sup>c</sup> | 0.0045 |
| BC-PLE-3 | 0.7991 <sup>b</sup> | 0.0078 | RC-PLE-3 | 0.6453 <sup>b</sup> | 0.0006 |
| BC-PLE-4 | 0.6916 <sup>d</sup> | 0.0078 | RC-PLE-4 | 0.3232 <sup>m</sup> | 0.0032 |
| BC-PLE-5 | 0.7941 <sup>b</sup> | 0.0089 | RC-PLE-5 | 0.7743 <sup>a</sup> | 0.0027 |

Results were expressed as mean  $\pm$  standard deviation (SD). Tukey's multiple comparison test was performed at  $p < 0.05$  and different letters represent statistically significant differences among samples.

**Table S4.** Total monomeric anthocyanin content (TMAC) of black and red currant extracts obtained by conventional and sustainable extraction techniques

| Black currant |                        |      | Red currant |                        |      |
|---------------|------------------------|------|-------------|------------------------|------|
| Sample        | TMAC<br>[mg CGE/100 g] | std  | Sample      | TMAC<br>[mg CGE/100 g] | std  |
| BC-S/L-1      | 60.73 <sup>i</sup>     | 0.54 | RC-S/L-1    | 8.49 <sup>g,h,i</sup>  | 0.05 |
| BC-S/L-2      | 85.89 <sup>d</sup>     | 2.22 | RC-S/L-2    | 9.28 <sup>e,f</sup>    | 0.06 |
| BC-S/L-3      | 81.66 <sup>e</sup>     | 1.17 | RC-S/L-3    | 9.45 <sup>e,f</sup>    | 0.17 |
| BC-UAE-1      | 69.52 <sup>g,h</sup>   | 0.19 | RC-UAE-1    | 8.33 <sup>h,i,j</sup>  | 0.05 |
| BC-UAE-2      | 90.06 <sup>c</sup>     | 1.39 | RC-UAE-2    | 11.05 <sup>b</sup>     | 0.13 |
| BC-UAE-3      | 96.07 <sup>b</sup>     | 1.83 | RC-UAE-3    | 9.73 <sup>d,e</sup>    | 0.35 |
| BC-UAE-4      | 80.88 <sup>e</sup>     | 0.35 | RC-UAE-4    | 11.64 <sup>a</sup>     | 0.22 |
| BC-UAE-5      | 80.71 <sup>e</sup>     | 0.26 | RC-UAE-5    | 10.28 <sup>c,d</sup>   | 0.32 |
| BC-MAE-1      | 104.09 <sup>a</sup>    | 1.01 | RC-MAE-1    | 9.59 <sup>e</sup>      | 0.17 |
| BC-MAE-2      | 76.15 <sup>f</sup>     | 1.59 | RC-MAE-2    | 8.96 <sup>f,g</sup>    | 0.07 |
| BC-MAE-3      | 69.58 <sup>g,h</sup>   | 0.82 | RC-MAE-3    | 10.38 <sup>c</sup>     | 0.14 |
| BC-PLE-1      | 71.64 <sup>g</sup>     | 1.93 | RC-PLE-1    | 8.02 <sup>i,j</sup>    | 0.17 |
| BC-PLE-2      | 66.41 <sup>h,i</sup>   | 0.26 | RC-PLE-2    | 8.62 <sup>g,h</sup>    | 0.12 |
| BC-PLE-3      | 59.11 <sup>j</sup>     | 1.17 | RC-PLE-3    | 7.76 <sup>j,k</sup>    | 0.10 |
| BC-PLE-4      | 64.90 <sup>i</sup>     | 1.26 | RC-PLE-4    | 7.20 <sup>k</sup>      | 0.35 |
| BC-PLE-5      | 59.95 <sup>j</sup>     | 1.20 | RC-PLE-5    | 8.52 <sup>g,h,i</sup>  | 0.12 |

Results were expressed as mean  $\pm$  standard deviation (SD). Tukey's multiple comparison test was performed at  $p < 0.05$  and different letters represent statistically significant differences among samples.
